# Supplementary material for: Cu(ii) nanocluster-grafted, Nb-doped TiO2 as an efficient visible-light-sensitive photocatalyst based on energy-level matching between surface and bulk states
Source: Royal Society of Chemistry journal article supplement (doi:10.1039/c4ta02211d), 2014-01-01
Supplement: c4ta02211d1.pdf [file c4ta02211d1.pdf]

## Supplementary Information

### Cu(II) nanocluster-grafted, Nb-doped TiO<sub>2</sub> as an efficient visible-light-sensitive photocatalysts based on energy-level matching between surface and bulk states

Min Liu,<sup>‡</sup> Xiaoqing Qiu,<sup>‡</sup> Kazuhito Hashimoto<sup>\*,‡,§</sup> and Masahiro Miyauchi,<sup>\*,†,||</sup>

<sup>†</sup>Department of Metallurgy and Ceramics Science, Graduate School of Science and Engineering, Tokyo Institute of Technology, 2-12-1 Ookayama, Meguro-ku, Tokyo 152-8552, Japan.

<sup>‡</sup>Research Center for Advanced Science and Technology, The University of Tokyo, 4-6-1 Komaba, Meguro-ku, Tokyo 153-8904, Japan.

<sup>§</sup>Graduate School of Engineering, The University of Tokyo, 7-3-1 Hongo, Bunkyo-ku, Tokyo 113-8656, Japan.

<sup>||</sup>Japan Science and Technology Agency (JST), ACT-C, 4-1-8 Honcho Kawaguchi, Saitama 332-0012, Japan.

Email: [mmiyauchi@ceram.titech.ac.jp](mailto:mmiyauchi@ceram.titech.ac.jp), [hashimoto@light.t.u-tokyo.ac.jp](mailto:hashimoto@light.t.u-tokyo.ac.jp)

### Contents

Table S1, S2

Figs. S1 to S16

Reference

**Table S1.** ICP measurement of Cu(II)-Nb<sub>x</sub>Ti<sub>1-x</sub>O<sub>2</sub>.

| <b>sample</b>        | <b>Cu(II)-Nb<sub>x</sub>Ti<sub>1-x</sub>O<sub>2</sub></b> |       |       |       |       |
|----------------------|-----------------------------------------------------------|-------|-------|-------|-------|
| Initial Nb<br>(wt%)  | 0.01                                                      | 0.05  | 0.1   | 0.5   | 1     |
| Measured Nb<br>(wt%) | 0.011                                                     | 0.055 | 0.111 | 0.506 | 0.972 |

**Table S2.** BET surface area of bare TiO<sub>2</sub>, Nb<sub>x</sub>Ti<sub>1-x</sub>O<sub>2</sub>, Cu(II)-TiO<sub>2</sub>, and Cu(II)-Nb<sub>x</sub>Ti<sub>1-x</sub>O<sub>2</sub>.

| Sample                               | TiO <sub>2</sub> | Nb <sub>x</sub> Ti <sub>1-x</sub> O <sub>2</sub> | Cu(II)-TiO <sub>2</sub> | Cu(II)-Nb <sub>x</sub> Ti <sub>1-x</sub> O <sub>2</sub> |
|--------------------------------------|------------------|--------------------------------------------------|-------------------------|---------------------------------------------------------|
| BET surface area (m <sup>2</sup> /g) | 6.03             | 5.76                                             | 5.93                    | 5.84                                                    |

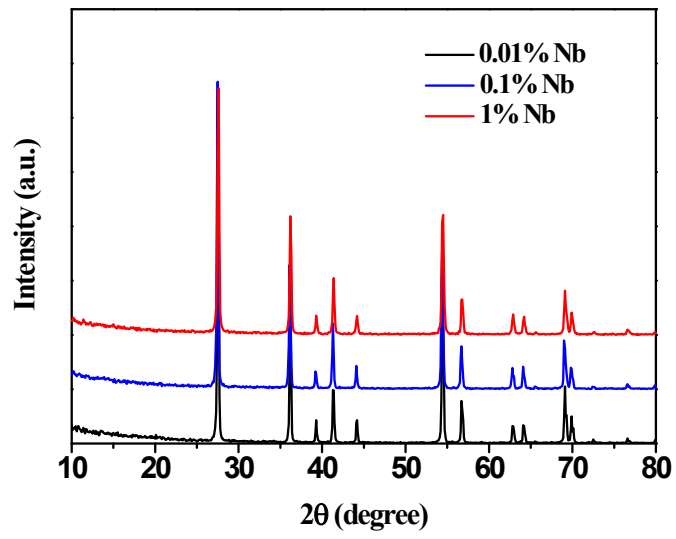

**Figure S1.** XRD patterns of 0.01 wt%, 0.1 wt% and 1 wt% Nb doped TiO<sub>2</sub>.

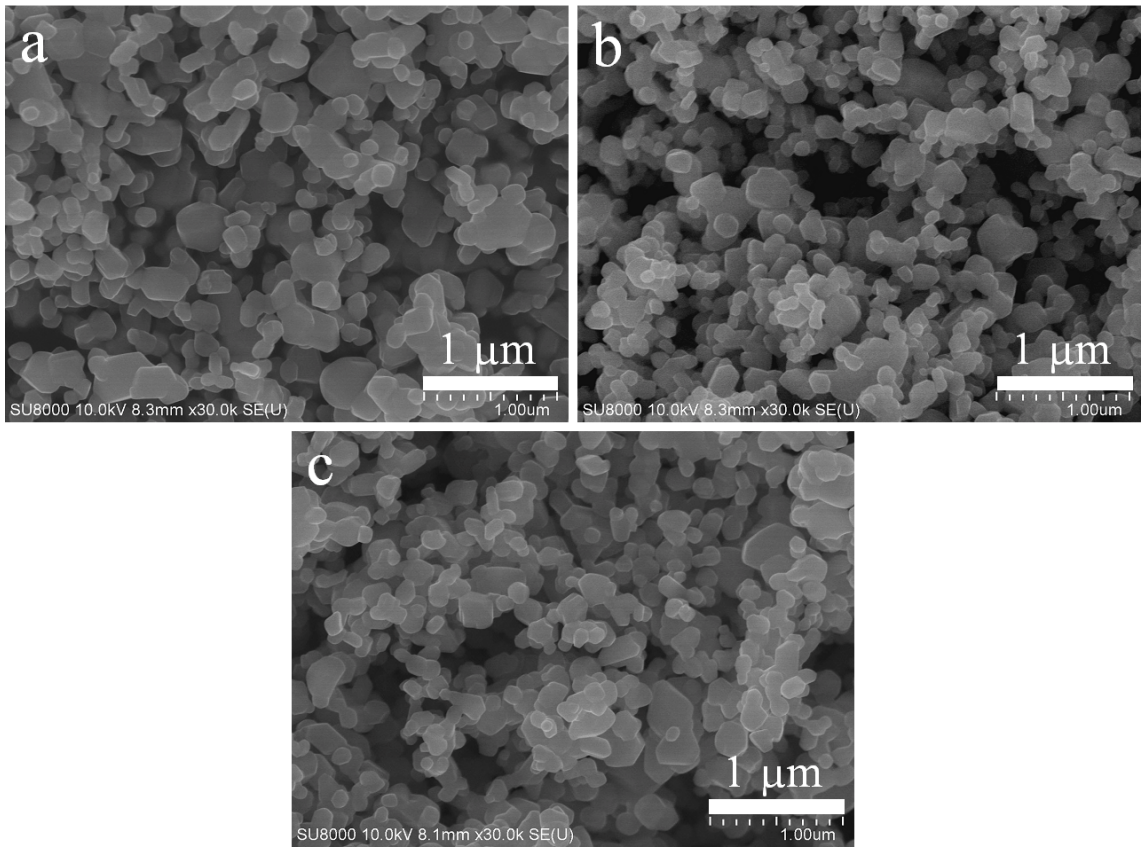

**Figure S2.** SEM images of  $\text{Nb}_x\text{Ti}_{1-x}\text{O}_2$  at (a)  $x=0.01$  wt%, (b)  $x=0.1$  wt%, and (c)  $x=1$  wt%, respectively.

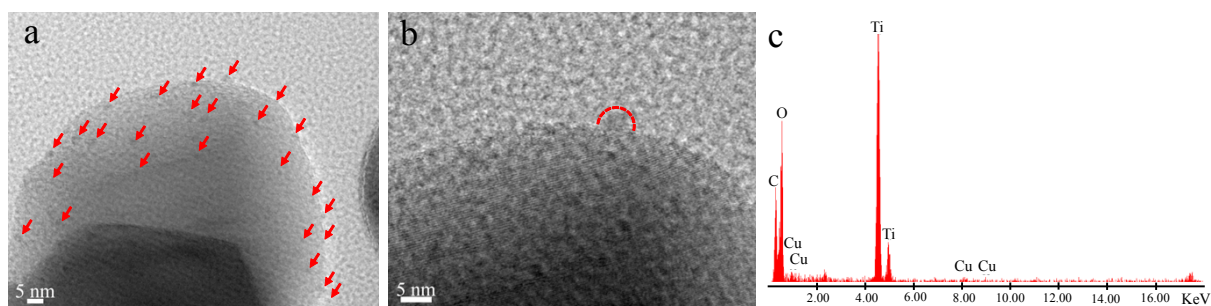

**Figure S3.** (a) TEM, (b) HRTEM images and (c) EDS pattern of  $\text{Cu(II)-Nb}_x\text{Ti}_{1-x}\text{O}_2$ . Nanoclusters (marked by red arrows) were highly dispersed on the  $\text{Nb}_x\text{Ti}_{1-x}\text{O}_2$  surface. In Figure S3b, a short dashed curve is outlined the Cu(II) nanoclusters. The good attachment of nanoclusters and  $\text{Nb}_x\text{Ti}_{1-x}\text{O}_2$  was clearly observed. Figure S3c shows the result of EDS point analysis on the corresponding Cu(II) nanocluster marked by the short dashed curve in Figure S3b.

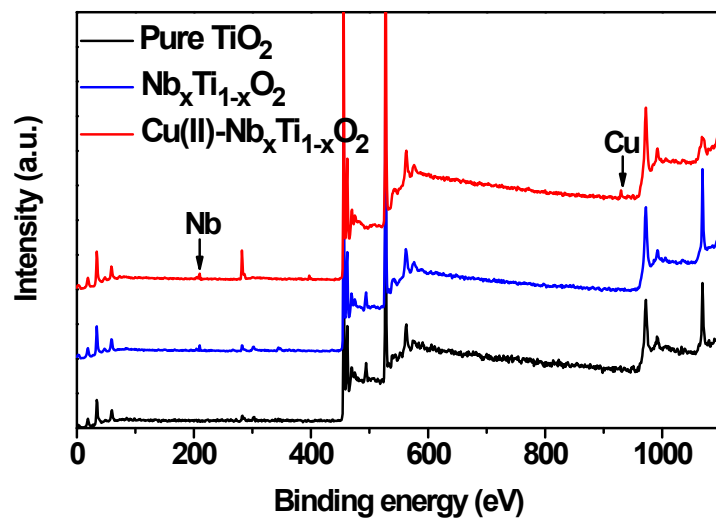

**Figure S4.** Full-scale XPS spectra of pure TiO<sub>2</sub>, Nb<sub>x</sub>Ti<sub>1-x</sub>O<sub>2</sub>, and Cu(II)-Nb<sub>x</sub>Ti<sub>1-x</sub>O<sub>2</sub>, respectively.

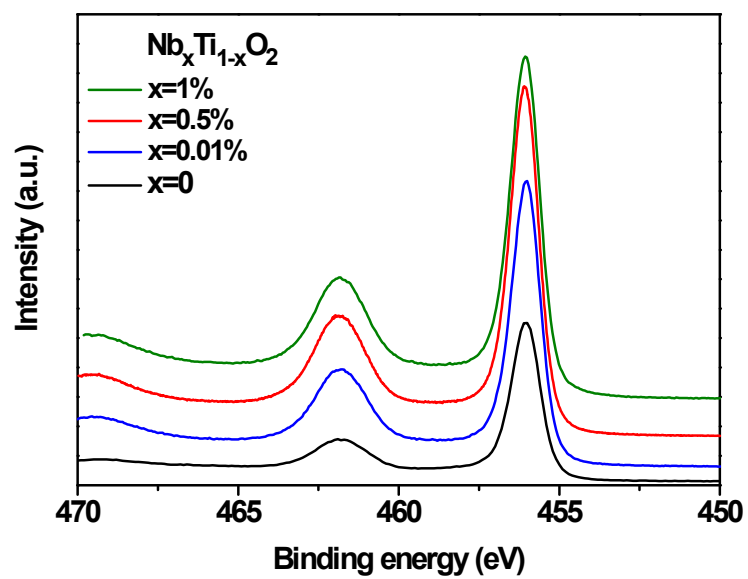

**Figure S5.** Ti 2p core-level spectra of pure  $\text{TiO}_2$ , and  $\text{Nb}_x\text{Ti}_{1-x}\text{O}_2$  at  $x=0.01$  wt%, 0.5 wt% and 1 wt%, respectively.



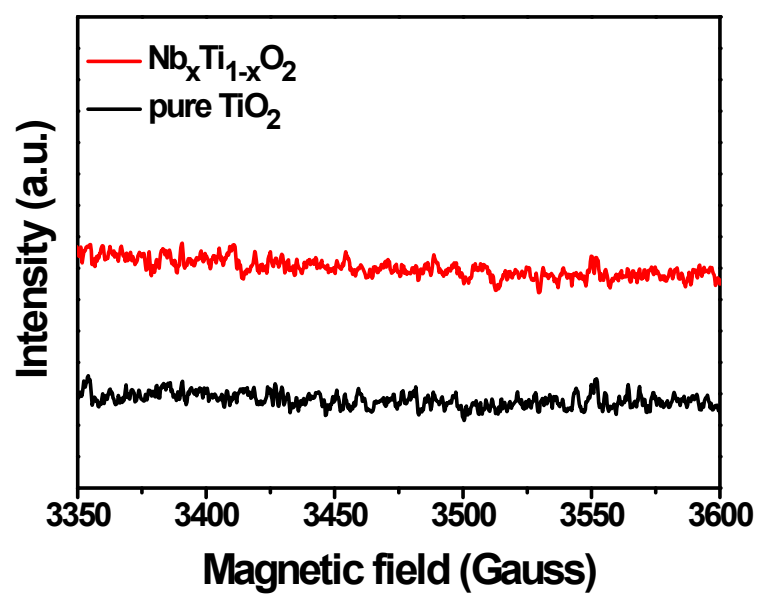

**Figure S6.** ESR spectra of pure  $\text{TiO}_2$  and  $\text{Nb}_x\text{Ti}_{1-x}\text{O}_2$  at 0.1 wt%.

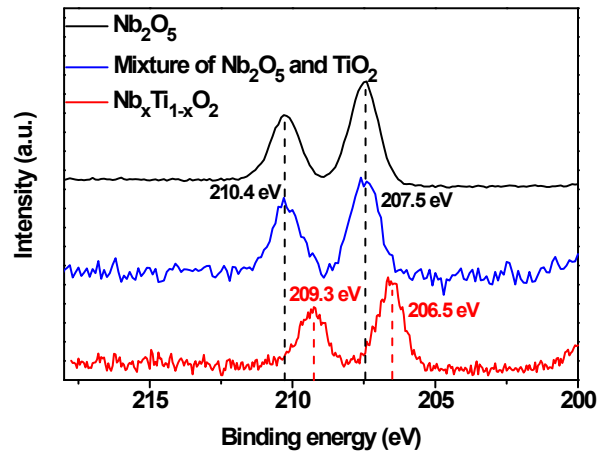

**Figure S7.** Nb 3d core-level spectra of pure  $\text{Nb}_2\text{O}_5$ , physical mixed  $\text{Nb}_2\text{O}_5$  and  $\text{TiO}_2$  and  $\text{Nb}_x\text{Ti}_{1-x}\text{O}_2$  at  $x = 0.1$  wt%, respectively.

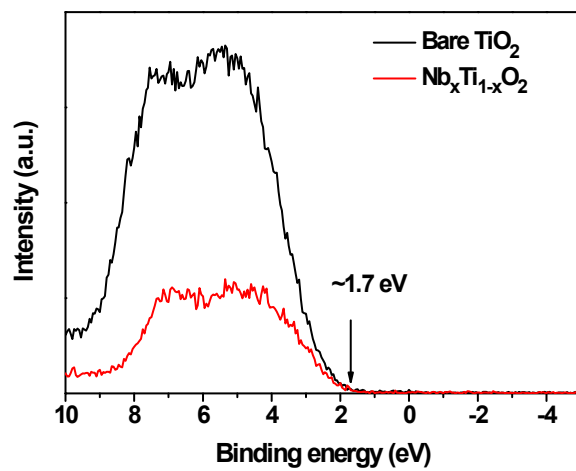

**Figure S8.** VB XPS of bare TiO<sub>2</sub>, and Nb<sub>x</sub>Ti<sub>1-x</sub>O<sub>2</sub> at x= 0.1 wt%, respectively.

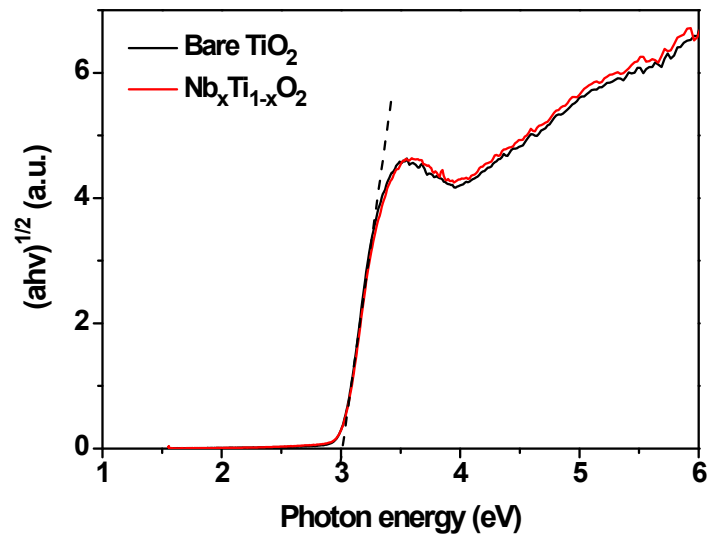

**Figure S9**, Band gap of bare TiO<sub>2</sub> and Nb<sub>x</sub>Ti<sub>1-x</sub>O<sub>2</sub> according to the Kubelka–Munk function.

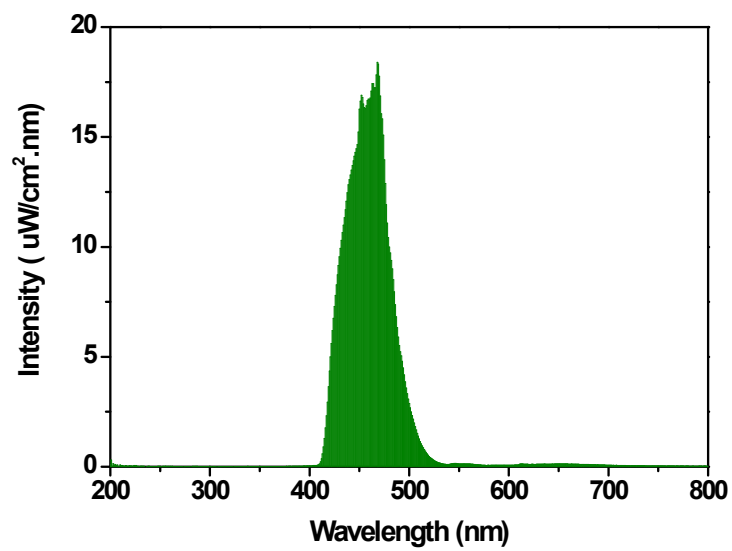

**Figure S10.** The light source for the visible light irradiation.

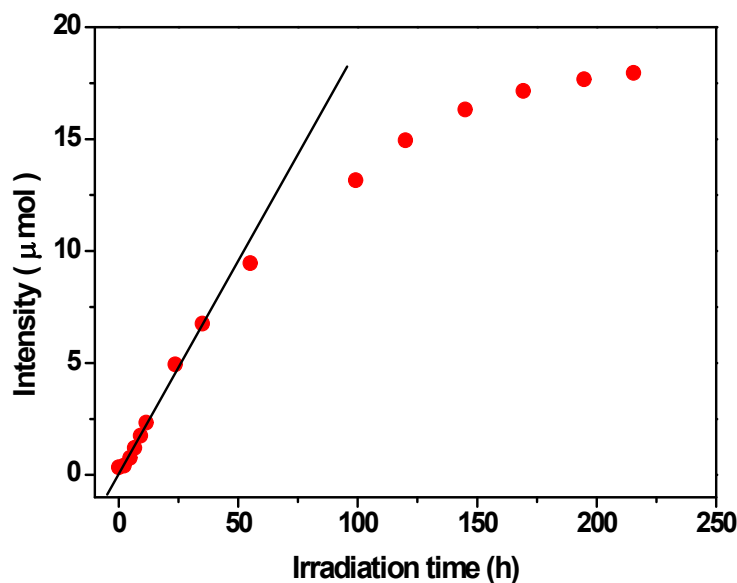

**Figure S11.** The CO<sub>2</sub> generation curve over Cu(II)-Nb<sub>x</sub>Ti<sub>1-x</sub>O<sub>2</sub> (x=0.1 wt%) sample under visible light irradiation. The CO<sub>2</sub> generation rate ( $R_{CO_2}$ ) was obtained from the slope of the CO<sub>2</sub> generation curve between the irradiation time of ca. 0 to 30 h.

The calculation of quantum efficiency (QE) was conducted using the same procedure reported in literature (*I*).

Take Cu(II)-Nb<sub>x</sub>Ti<sub>1-x</sub>O<sub>2</sub> at x=0.1% sample for example. Under the visible light irradiation, the wavelength of visible light is from 400 to 530 nm, and the light intensity is 1 mW/cm<sup>2</sup>. The irradiating area is 5.5 cm<sup>2</sup>. Therefore, the absorption rate of incident photons ( $R_p^a$ ) was determined to be  $7.91 \times 10^{14}$  quanta·sec<sup>-1</sup> using the following equation:  $R_p^a = \int_{400}^{530} S \times \alpha \times I$  ( $S$  is the area of the sample,  $\alpha$  is the light absorption and  $I$  is the light intensity at each wavelength). As for CO<sub>2</sub> generation, assuming that the reaction from IPA to CO<sub>2</sub> is proceeded:  $C_3H_8O + 5H_2O + 18h^+ \rightarrow 3CO_2 + 18H^+$ , that is, six photons are required to produce one CO<sub>2</sub> molecule. The CO<sub>2</sub> generation rate ( $R_{CO_2}$ ) was obtained from the slope of the CO<sub>2</sub> generation curve in Figure S9. As shown in Figure S9,  $R_{CO_2}$  was determined to be 0.20 μmol·h<sup>-1</sup>. Thus the QE for CO<sub>2</sub> generations were

calculated using the following equation:

$$\begin{aligned} \text{QE} &= 6 \times \text{CO}_2 \text{ generation rate} / \text{absorption rate of incident photon} \\ &= 6 \times (2.0 \times 10^{-1} \times 10^{-6} / 3.6 \times 10^3) \text{mol} \cdot \text{sec}^{-1} \times 6.0 \times 10^{23} \text{quanta} \cdot \text{mol}^{-1} \\ &\quad / 7.91 \times 10^{14} \text{quanta} \cdot \text{sec}^{-1} \\ &= 25.3 \times 10^{-1} (25.3\%). \end{aligned}$$

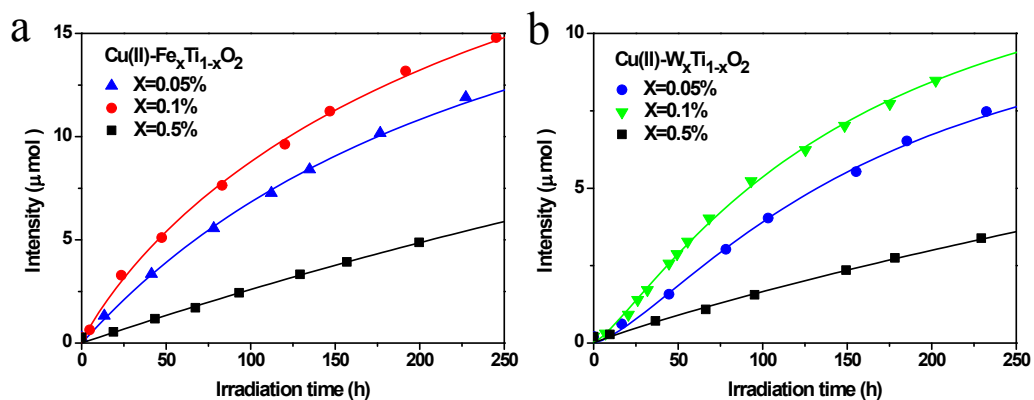

**Figure S12.** CO<sub>2</sub> generation over (a) Cu(II)-Fe<sub>x</sub>Ti<sub>1-x</sub>O<sub>2</sub> at x=0.05 wt%, 0.1 wt%, and 0.5 wt%, and (b) Cu(II)-W<sub>x</sub>Ti<sub>1-x</sub>O<sub>2</sub> at x=0.05 wt%, 0.1 wt%, and 0.5 wt%, under visible light irradiation.



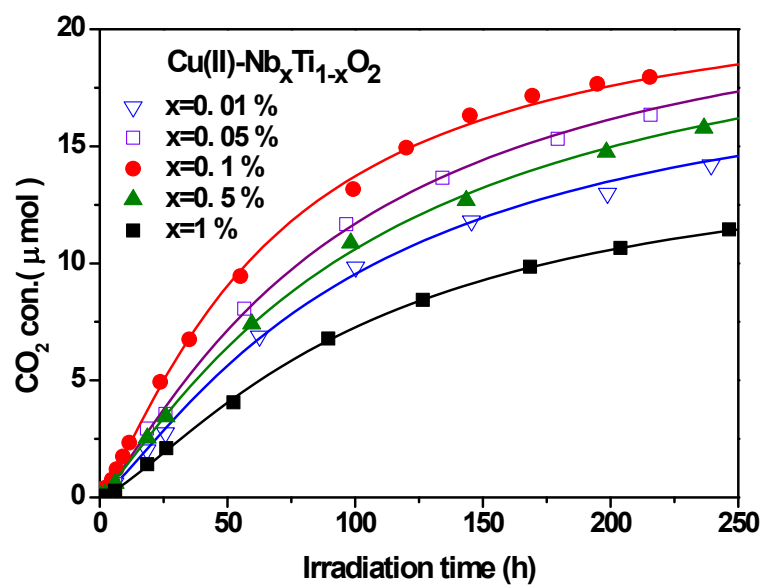

**Figure S13.** CO<sub>2</sub> generation over Cu(II)-Nb<sub>x</sub>Ti<sub>1-x</sub>O<sub>2</sub> at x=0.01 wt%, 0.05 wt%, 0.1 wt%, 0.5 wt% and 0.5 wt% under visible light irradiation.

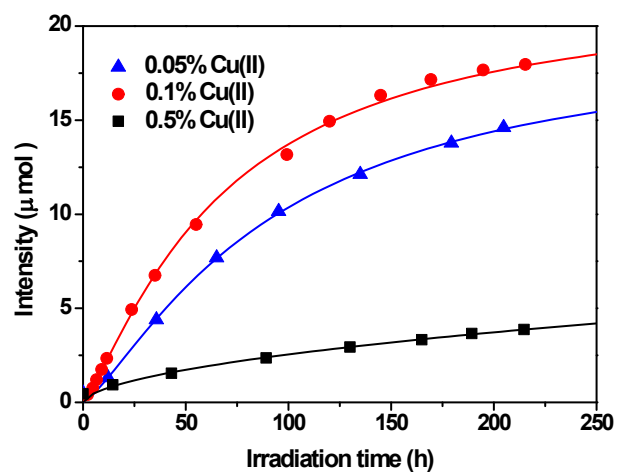

**Figure S14.** CO<sub>2</sub> generation over Cu(II)-Nb<sub>x</sub>Ti<sub>1-x</sub>O<sub>2</sub> grafted with x=0.05 wt%, 0.1 wt%, and 0.5 wt% Cu(II) nanoclusters under visible light irradiation.

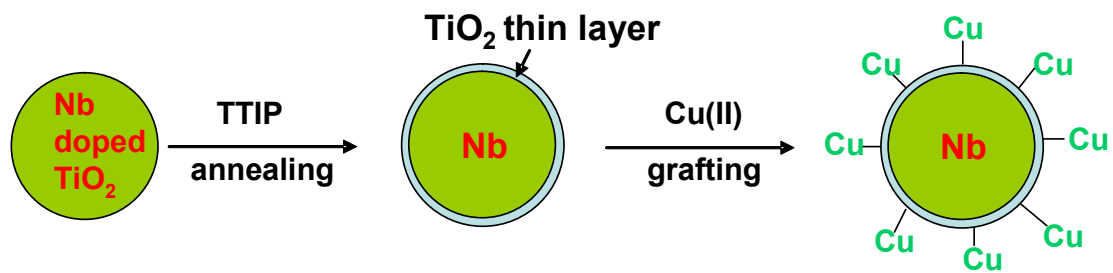

**Figure S15.** Scheme for the preparation of the samples by introducing a TiO<sub>2</sub> thin layer between Cu(II) nanoclusters and Nb<sub>x</sub>Ti<sub>1-x</sub>O<sub>2</sub> (x=0.1 wt%).

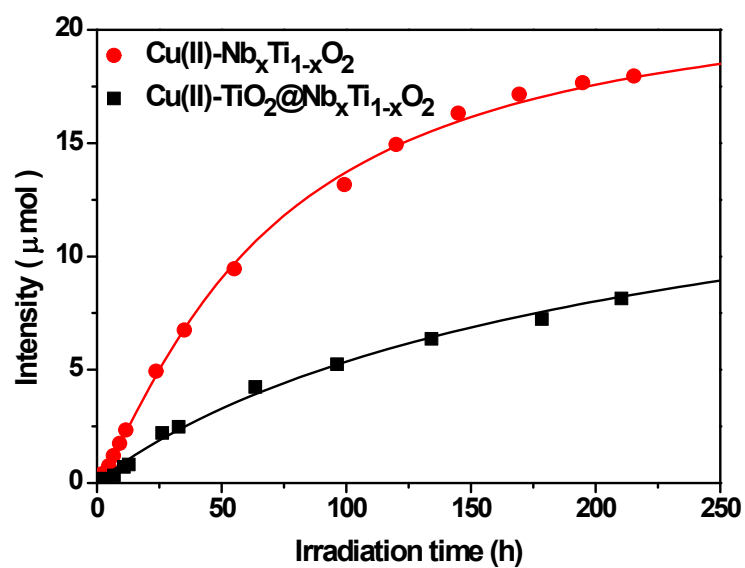

**Figure S16.** The CO<sub>2</sub> generation curve over Cu(II)-Nb<sub>x</sub>Ti<sub>1-x</sub>O<sub>2</sub> and Cu(II)-TiO<sub>2</sub>@Nb<sub>x</sub>Ti<sub>1-x</sub>O<sub>2</sub> (x=0.1 wt%) samples under the same visible light irradiation.

## References

1. H. G. Yu, H. Irie, Y. Shimodaira, Y. Hosogi, Y. Kuroda, M. Miyauchi, K. Hashimoto, *J. Phys. Chem. C* 2010, **114**, 16481-16487.
